# Supplementary material
Source: publisher figshare collection journal article supplement (https://karger.figshare.com/ndownloader/files/24439343)
Supplement: Supplementary file 1 [file 24439343]

**Supplemental Table 1. Study quality assessment overview (66 cohort studies)**

| Study | Representativeness of the exposed cohort | Selection of the non- exposed cohort | Ascertainment of exposure | Demonstration that outcome of interest was not present at start of study | Comparability | Assessment of outcome | Was follow-up long enough for outcomes to occur | Adequacy of follow up of cohorts | Total |
| --- | --- | --- | --- | --- | --- | --- | --- | --- | --- |
| Riise 2019 | * | * | * | * | * | * | * | * | 8 |
| Haug 2019 | * | * | * | * | ** | * | * | * | 9 |
| Grandi 2018 | * | * | * | * | * | * | * | * | 8 |
| Kuo 2018 | * | * |  | * | * | * | * | * | 7 |
| Mito 2018 |  | * | * | * | * | * | * | * | 7 |
| Bergen 2018 | * | * | * | * | * | * | * | * | 8 |
| Stuart 2018 | * | * | * | * | * | * | * | * | 8 |
| Auger 2017 | * | * | * |  | ** | * | * | * | 8 |
| Ghossein-Doha 2017 |  |  | * | * |  | * | * | * | 5 |
| McDonald 2016 |  |  | * | * | * | * |  | * | 5 |
| Canoy 2016 | * | * | * | * |  | * | * | * | 7 |
| Behrens 2016 | * | * | * | * | ** | * | * | * | 9 |
| Tooher 2016 | * | * | * | * |  | * |  | * | 6 |
| Weissgerber 2016 | * | * | * |  | * | * |  | * | 6 |
| Kessous 2015 | * | * | * | * | * | * | * | * | 8 |
| Savitz 2014 | * | * | * | * | * | * |  | * | 7 |
| Weissgerber 2013 | * | * | * | * | * | * |  |  | 6 |
| Mannisto 2013 | * | * | * |  | * | * | * |  | 6 |
| Bhattacharya 2012 | * | * | * |  | * | * | * |  | 6 |
| Drost 2012 | * | * | * | * | * | * | * | * | 8 |
| Skjaerven 2012 | * | * | * |  | * | * | * | * | 7 |
| Lin 2011 | * | * | * | * | ** | * | * | * | 9 |
| Mongraw-Chaffin 2010 | * | * | * | * | ** | * | * | * | 9 |
| Lykke 2009 | * | * | * | * | * | * | * | * | 8 |
| Garovic 2010 | * | * | * | * | * | * |  |  | 6 |
| Haukkamaa 2009 | * | * | * |  |  | * |  | * | 5 |
| Cassidy-Bushrow 2009 | * | * | * |  | * | * | * | * | 7 |
| Wikstrom 2005 | * | * | * |  | * | * | * | * | 7 |
| Funai 2005 | * | * | * |  | * | * | * | * | 7 |
| Arnadottir 2005 |  | * | * | * | * | * | * | * | 7 |
| Wilson 2003 | * | * | * | * | ** | * |  | * | 8 |
| Smith 2001 | * | * | * | * | * | * | * | * | 8 |
| Nelander 2016 | * | * | * | * | * | * | * | * | 8 |
| Kurabayashia 2013 |  | * | * | * | * | * |  | * | 6 |
| Andersgaard 2012 | * | * |  |  |  | * | * | * | 5 |
| Gordin 2009 | * | * | * |  |  | * | * | * | 6 |
| Hovsepian 2014 | * | * | * | * | * | * |  | * | 7 |
| Kaaja 2005 | * | * | * | * |  | * |  | * | 6 |
| Melchiorre 2011 | * |  | * | * | * | * | * | * | 7 |
| Nijdam 2009 | * | * | * |  |  | * | * | * | 6 |
| Berends 2008 | * | * | * |  |  | * | * | * | 6 |
| Portelinha 2010 |  | * | * | * |  | * | * | * | 6 |
| Hannaford 1997 | * | * | * | * |  | * | * | * | 7 |
| Best 2017 |  | * | * | * | * | * | * | * | 7 |
| Valdes 2009 | * | * |  | * | * | * |  |  | 5 |
| Marin 2000 | * | * | * | * |  | * | * | * | 7 |
| Blaauw 2006 |  | * | * | * | * | * | * |  | 6 |
| Canti 2010 | * | * | * |  |  | * | * | * | 6 |
| Kharazmi 2007 | * | * | * | * |  | * |  | * | 6 |
| Spaan 2009 |  |  |  | * | * | * | * | * | 5 |
| Gaugler-Senden 2008 |  |  | * | * | * | * | * | * | 6 |
| Shahbazian 2011 |  |  | * | * | * | * | * | * | 6 |
| Manten 2007 | * |  | * | * |  | * | * | * | 6 |
| Diehl 2008 | * | * | * | * | * | * | * | * | 8 |
| Hubel 2000 | * | * | * |  | * | * | * | * | 7 |
| Sattar 2003 | * | * | * | * | * | * | * | * | 8 |
| Edlow 2009 | * | * | * | * | * | * | * |  | 7 |
| Magnussen 2009 | * | * | * |  | * | * | * | * | 7 |
| Leon 2019 | * | * | * | * | ** | * | * | * | 9 |
| Heida 2015 | * | * | * | * | * | * | * | * | 8 |
| Kestenbaum 2003 | * | * | * | * | * | * | * | * | 8 |
| Iversen 2010 | * | * | * | * | * | * | * | * | 8 |
| Jonsdottir 1995 | * |  | * | * |  | * | * | * | 6 |
| Ray 2005 | * | * | * | * | ** | * | * | * | 9 |
| Shalom 2013 | * | * | * | * |  | * | * |  | 6 |
| Park 2018 | * | * | * | * | * | * | * |  | 7 |
